# Supplementary material
Source: Research Square preprint supplement (doi:10.21203/rs.3.rs-9120093/v1)
Supplement: Supplementary file 2 [file a9e7e8ae3f6a6c1888385c78.docx]

**Supplementary Information for**

**Self-guided reinforcement learning enables HLA-presented peptide vaccine candidate design**

Guanqiao Zhang1*#*, Yaqi Fu1*#*, Damiano Buratto1,2, Kevin C. Chan5, Hanyao Wang1, Yuanling Huang1,6, Shi-Meng Gong1, Chuanxi Xu1, Xufan Gao1, Liquan Huang1,2, Zaixing Yang1, Ruhong Zhou1,2,3,4*

*1 College of Physics, Institute of Quantitative Biology, and College of Life Sciences, Zhejiang University, Hangzhou 310027, China*

2 *Zhejiang Key Laboratory of Cell and Molecular Intelligent Design and Development, Zhejiang University, Hangzhou 310058, China*

*3 The First Affiliated Hospital, School of Medicine, Zhejiang University, Hangzhou 310058, China*

*4 Department of Chemistry, Columbia University, New York, NY 10027, USA*

*5 Department of Biosciences and Bioinformatics, School of Science, Xi’an Jiaotong-Liverpool University, Suzhou, China*

*6 Institute WUT-AMU, Wuhan University of Technology, Wuhan 430070, China*

*#These authors contribute equally to the work*

**Correspondence should be addressed to* [*rhzhou@zju.edu.cn*](mailto:rhzhou@zju.edu.cn)


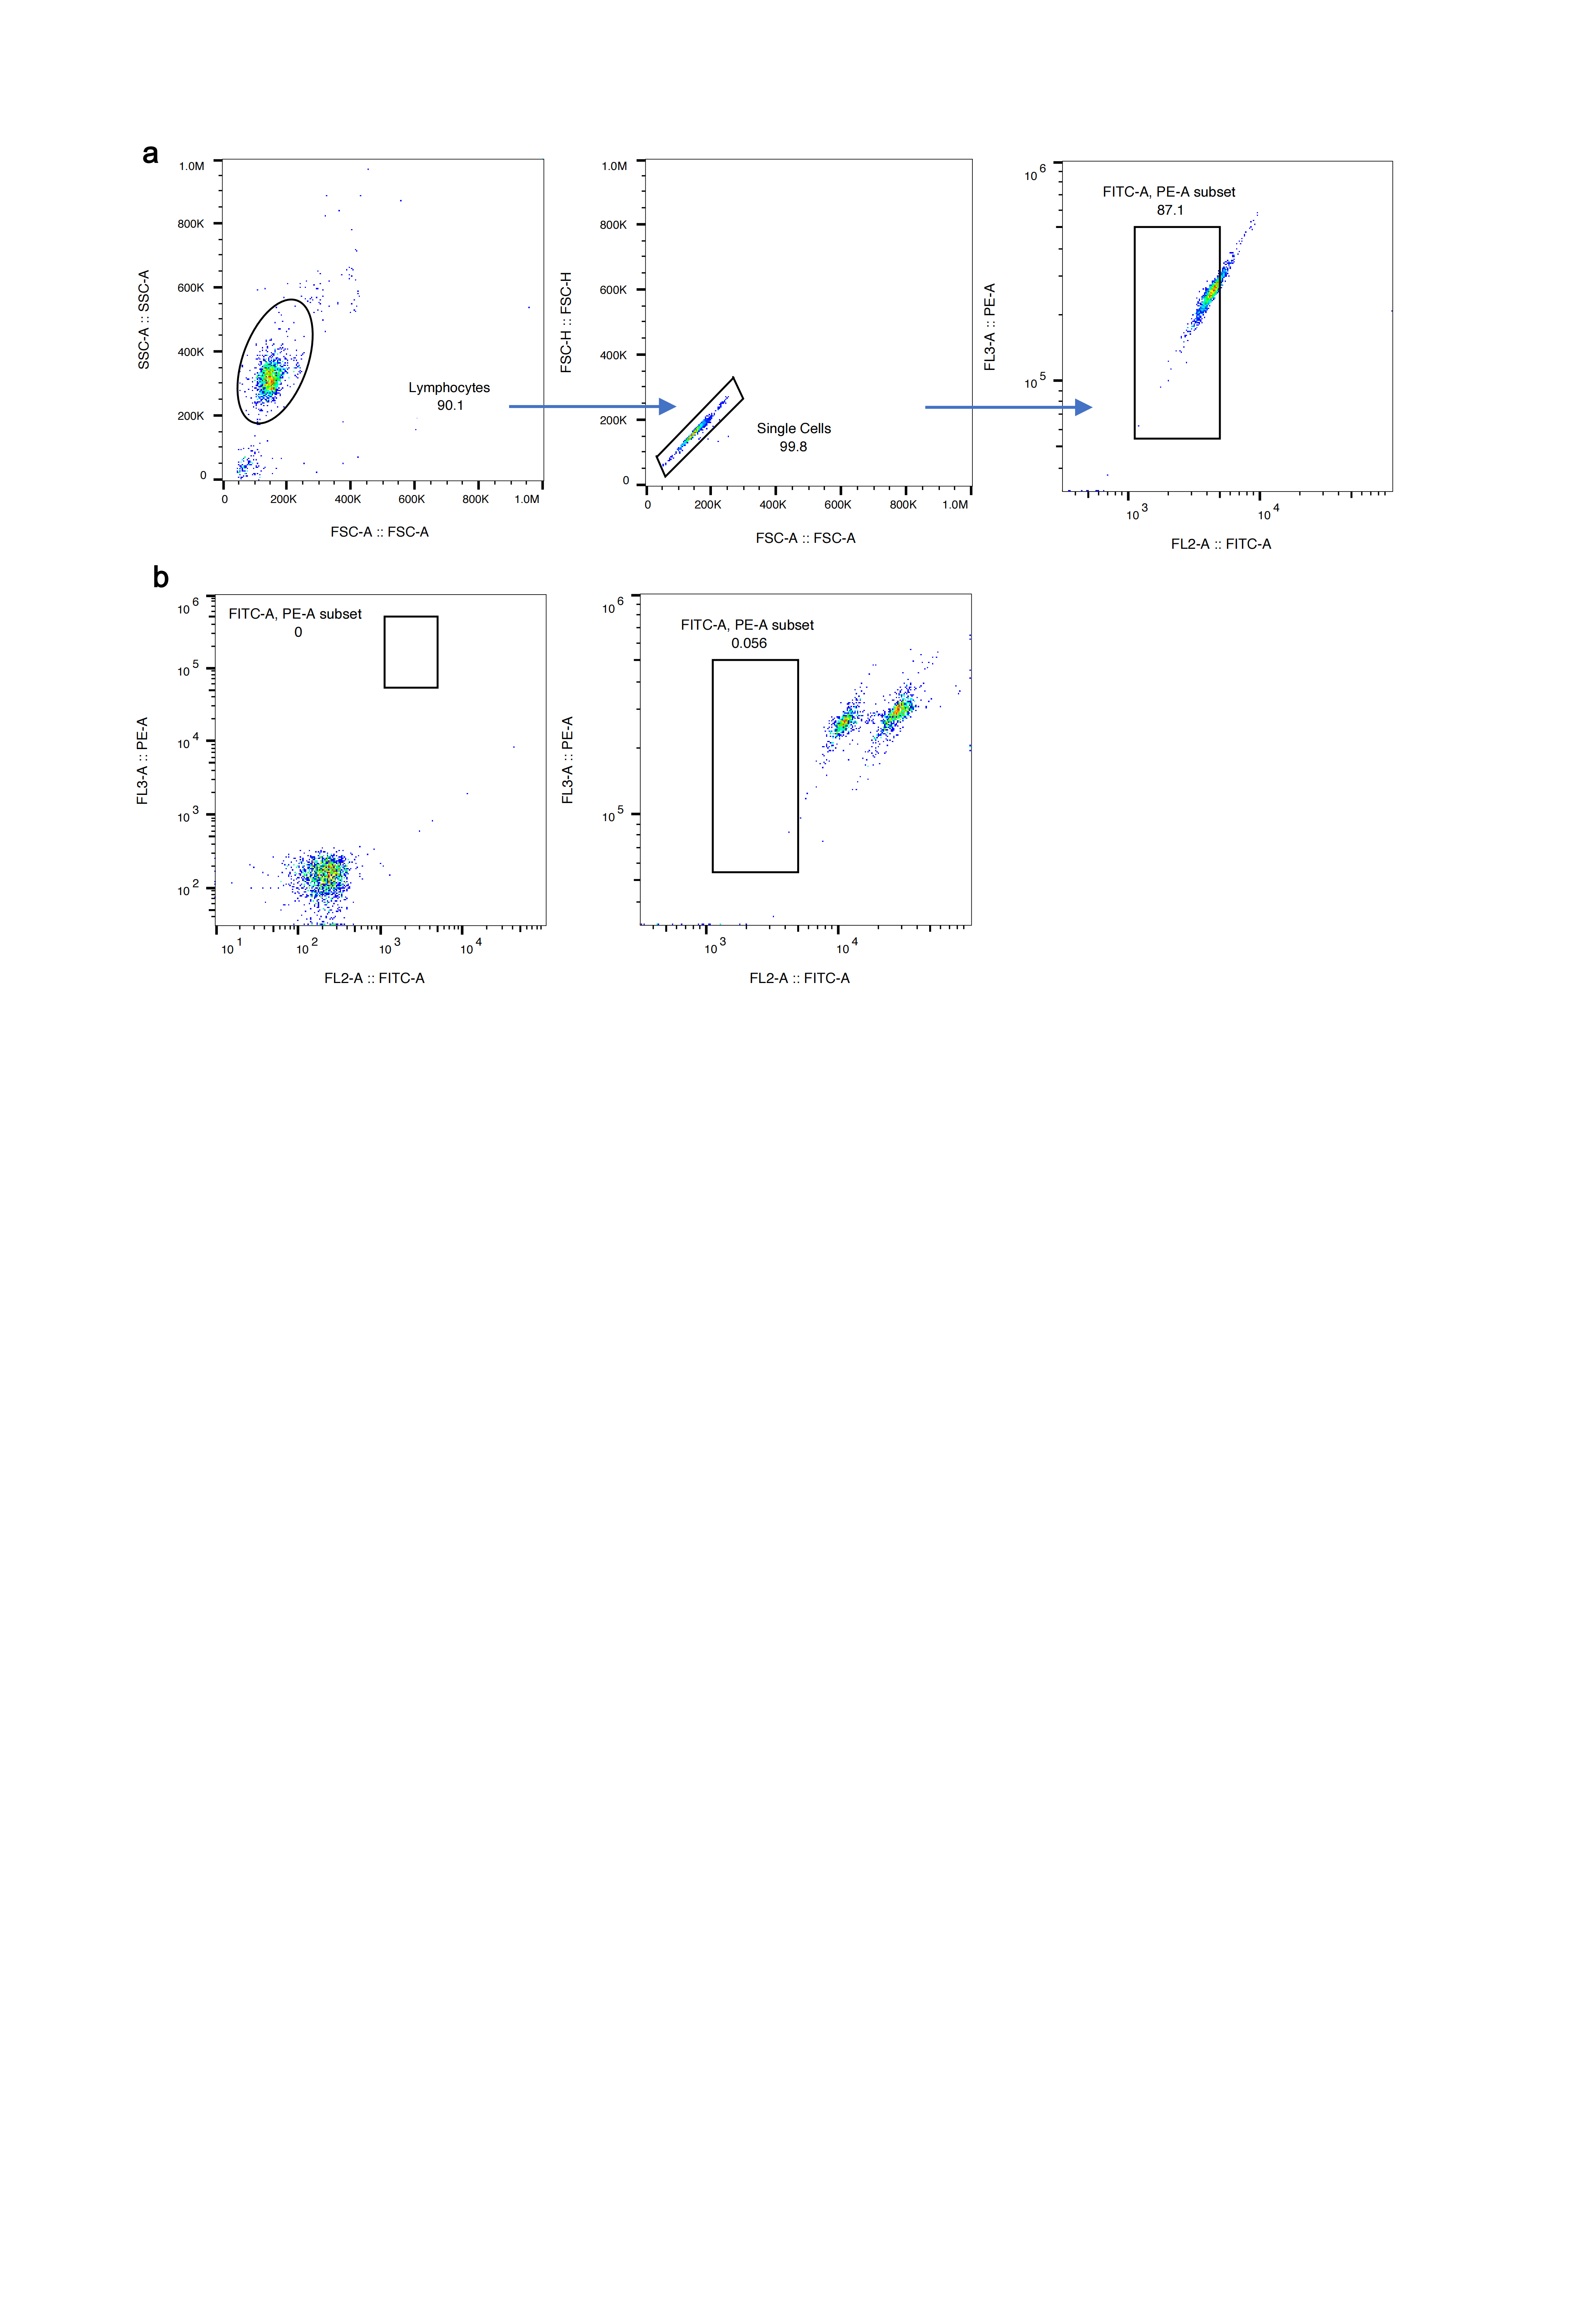


**Supplementary Fig. 1 Gating strategy of the peptide exchange assay in strategy validation. (a)** Gating strategy for Peptide exchange assay. **(b)** Flow cytometric plots of 0% and 100% exchange rates, respectively.


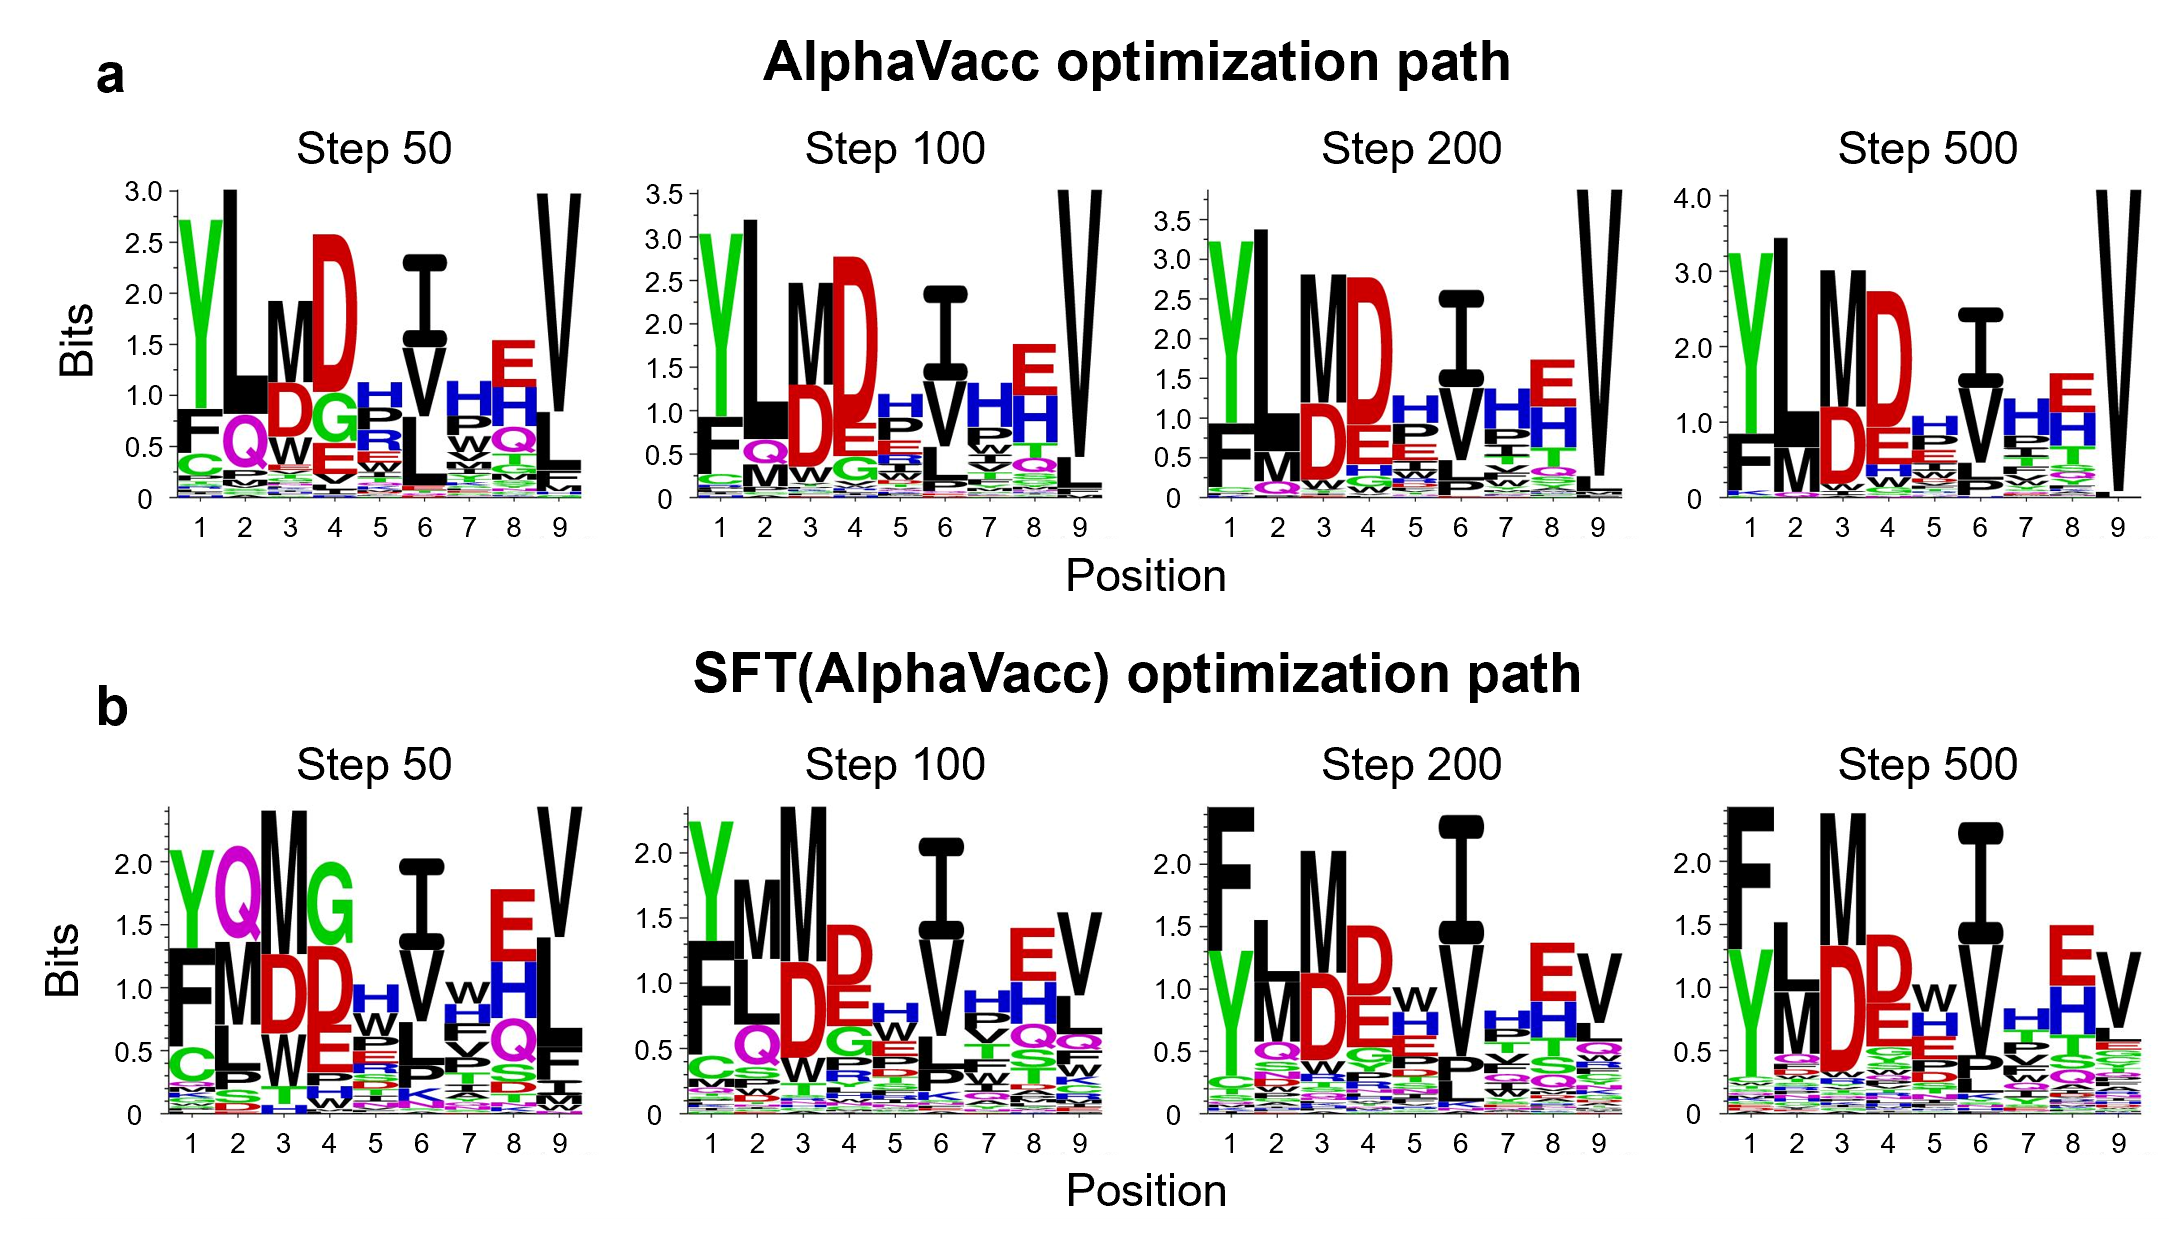


**Supplementary Fig. 2 Ablation experiments validate the importance of MCTS performance in AlphaVacc. (a)** The computed motifs of the datasets generated by AlphaVacc were collected along the optimization path. **(b)** The computed motifs of the datasets generated by SFT(AlphaVacc) were collected along the optimization path.


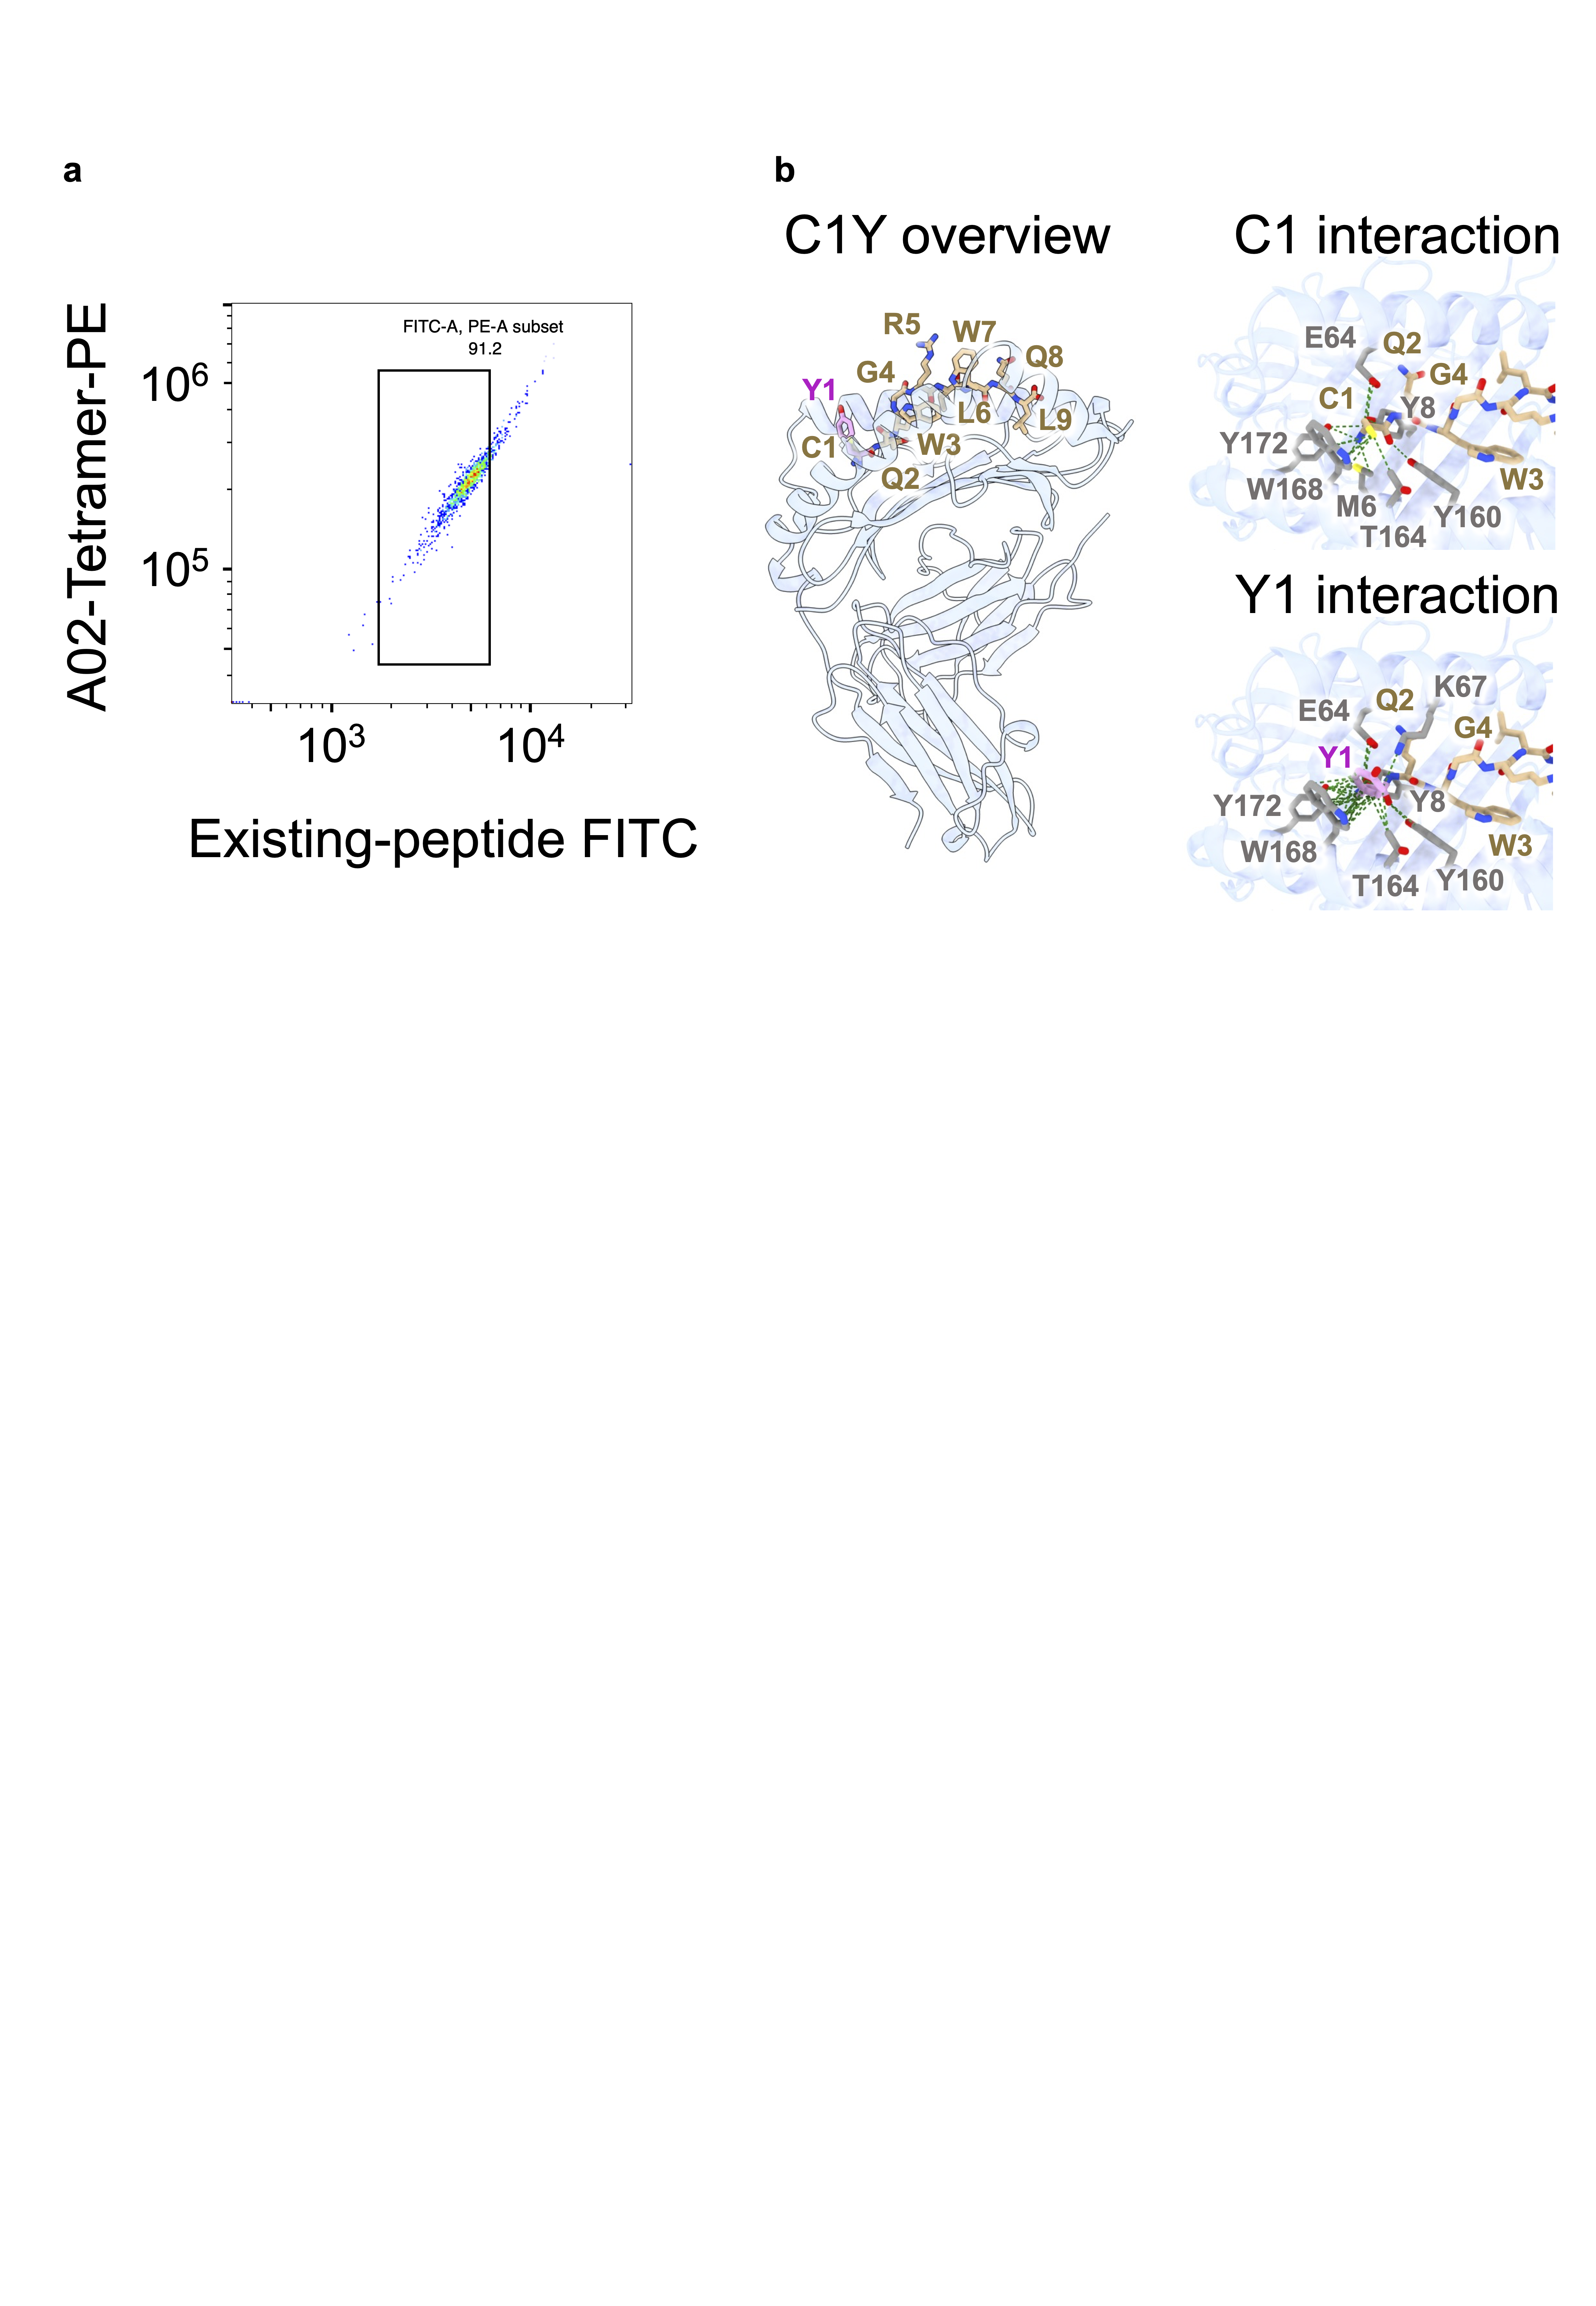


**Supplementary Fig. 3 Representative flow cytometry plot for BING-4 peptide and interaction of representative single-mutant variant. (a)** Representative flow cytometry plot for BING-4 peptide CQWGRLWQL (WT). **(b)** Comparison of hydrogen bonding interactions between WT (cysteine in position 1, C1) and pep1 (tyrosine in position 1, Y1).

**
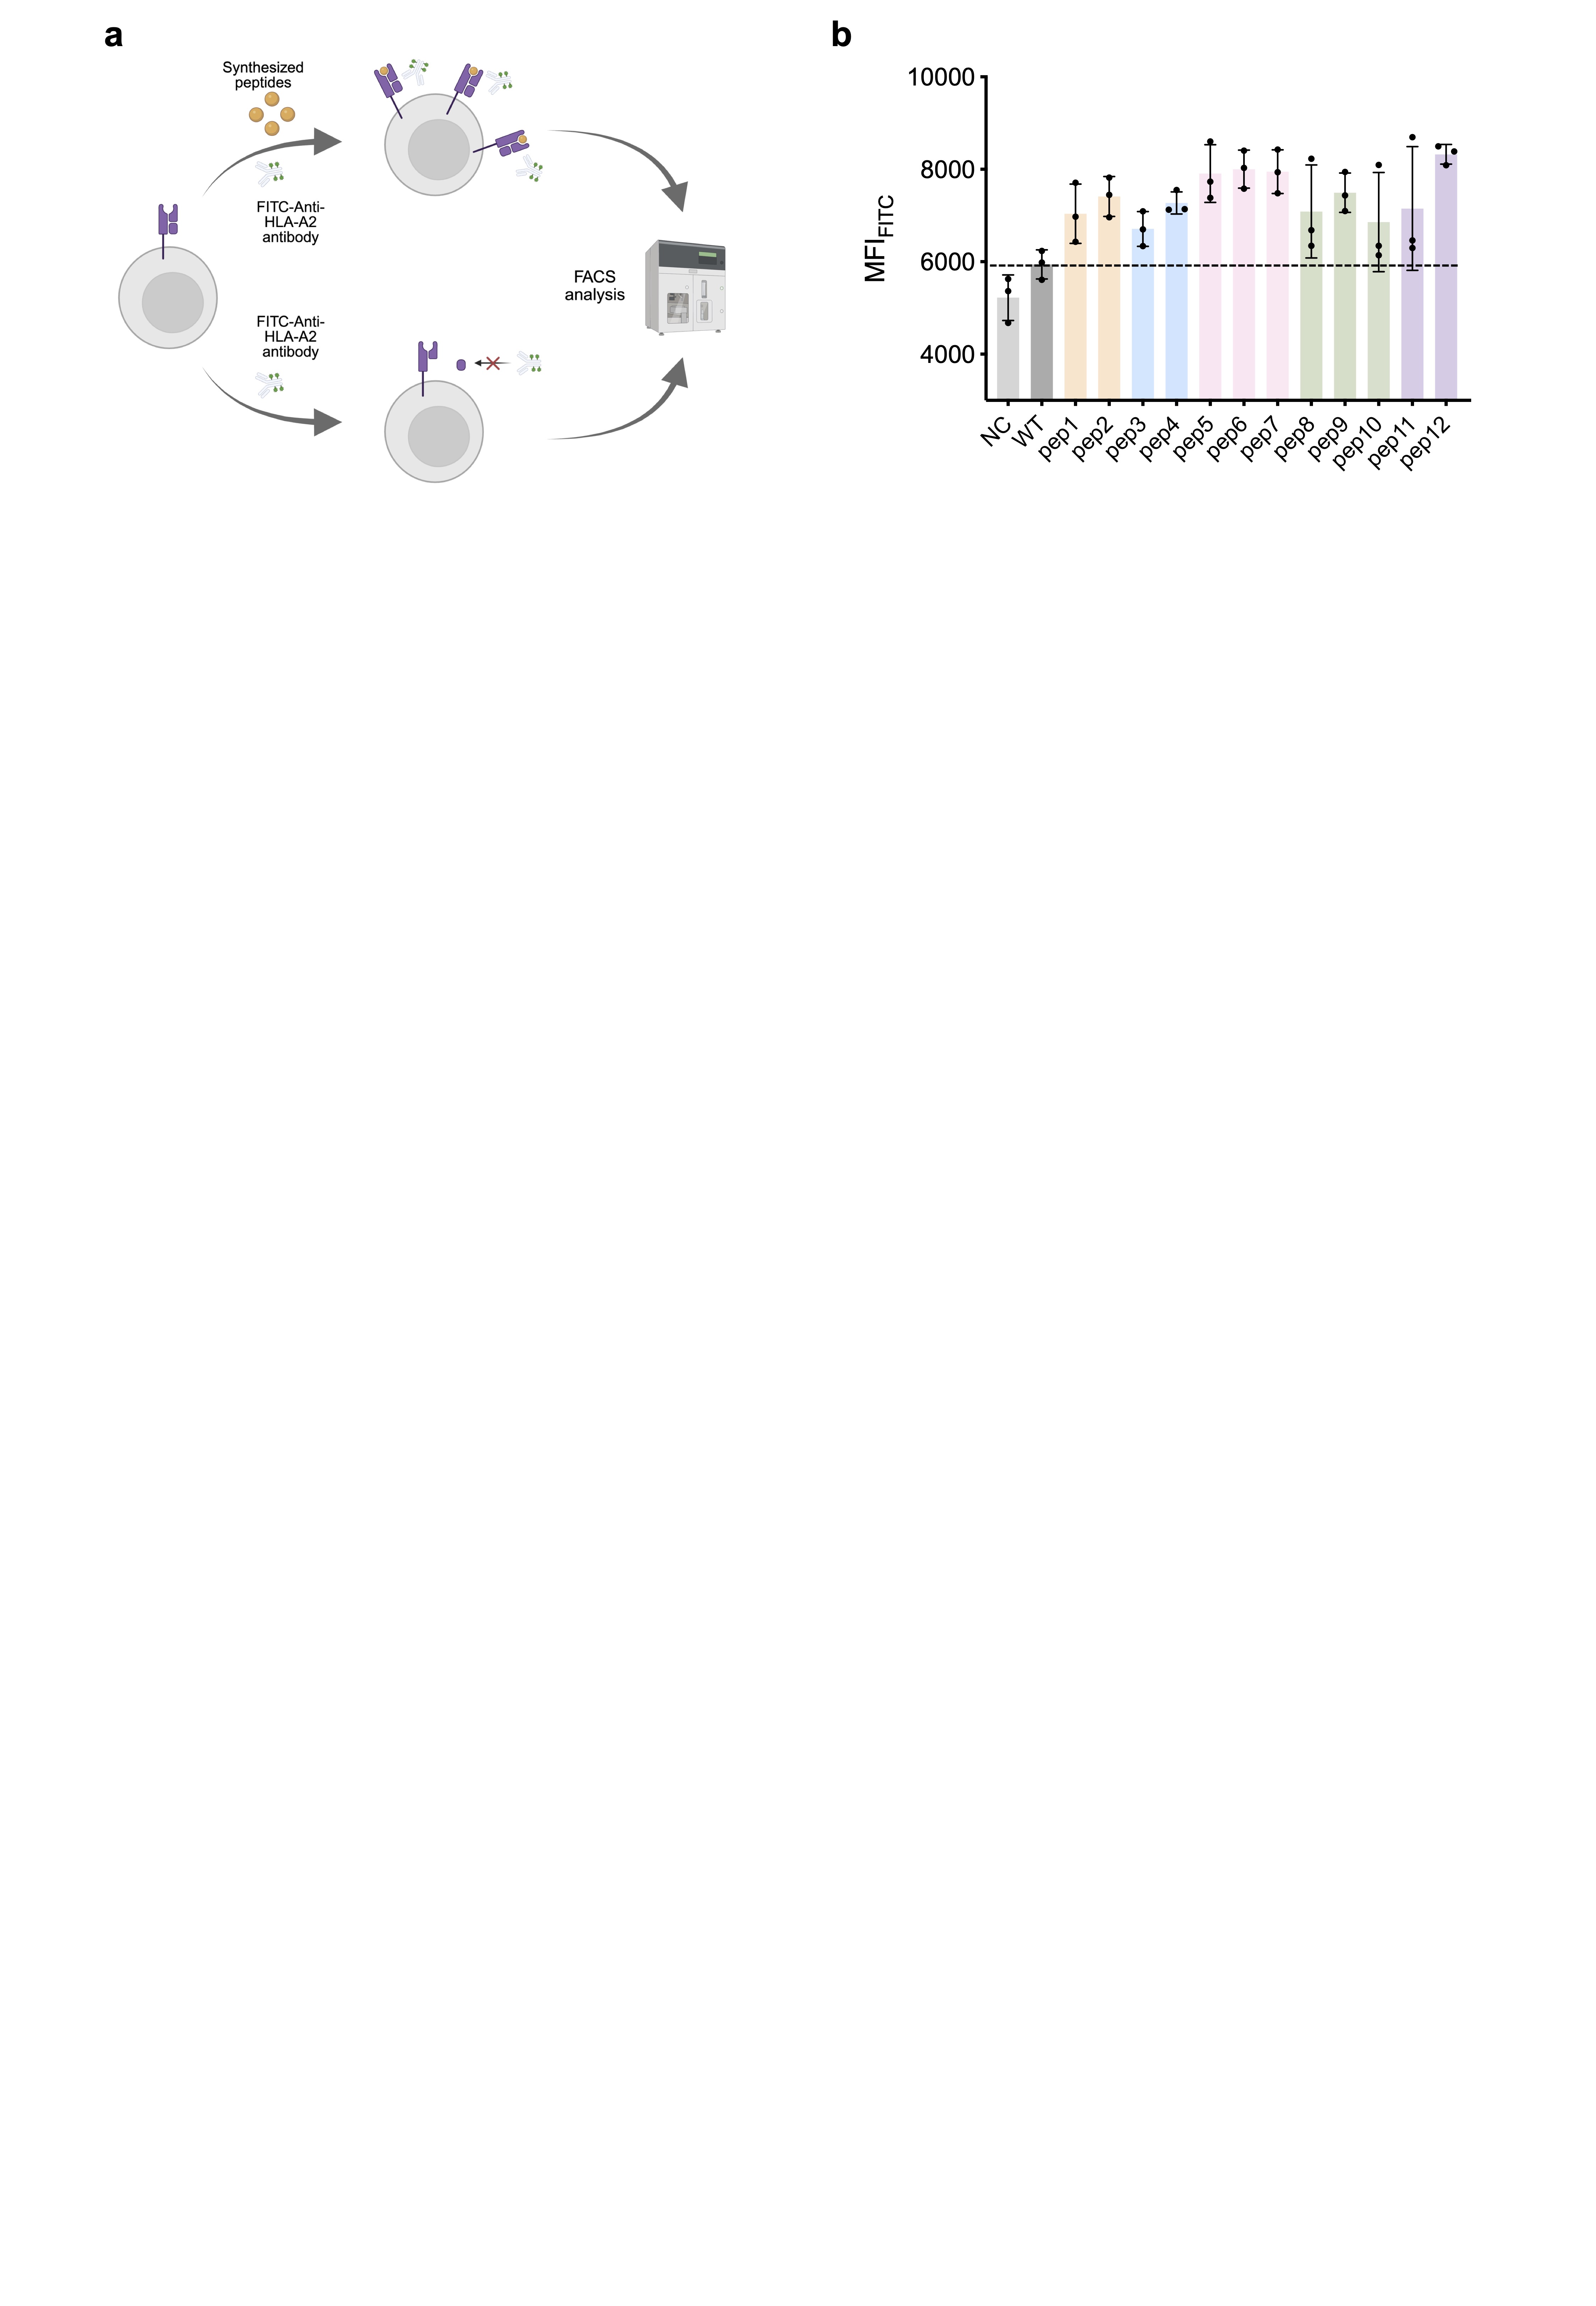
**

**Supplementary Fig. 4 Gating strategy for the CQW and candidate peptide exchange assay and T2 binding assay. (a)** Schematic diagram of the T2 peptide-binding assay. Created in <https://BioRender.com>. **(b)** The bar plot depicts the MFIFITC of HLA-A*02:01 staining. The dashed line indicates the fluorescence intensity level of WT.





**Supplementary Fig. 5 Gating strategy for the CQW and candidate peptide exchange assay and T2 binding assay. (a)** Gating strategy for the peptide exchange assay. **(b)** Flow cytometric plots of 0% and 100% exchange rates, respectively. **(c)** Gating strategy of the T2 binding assay.

**
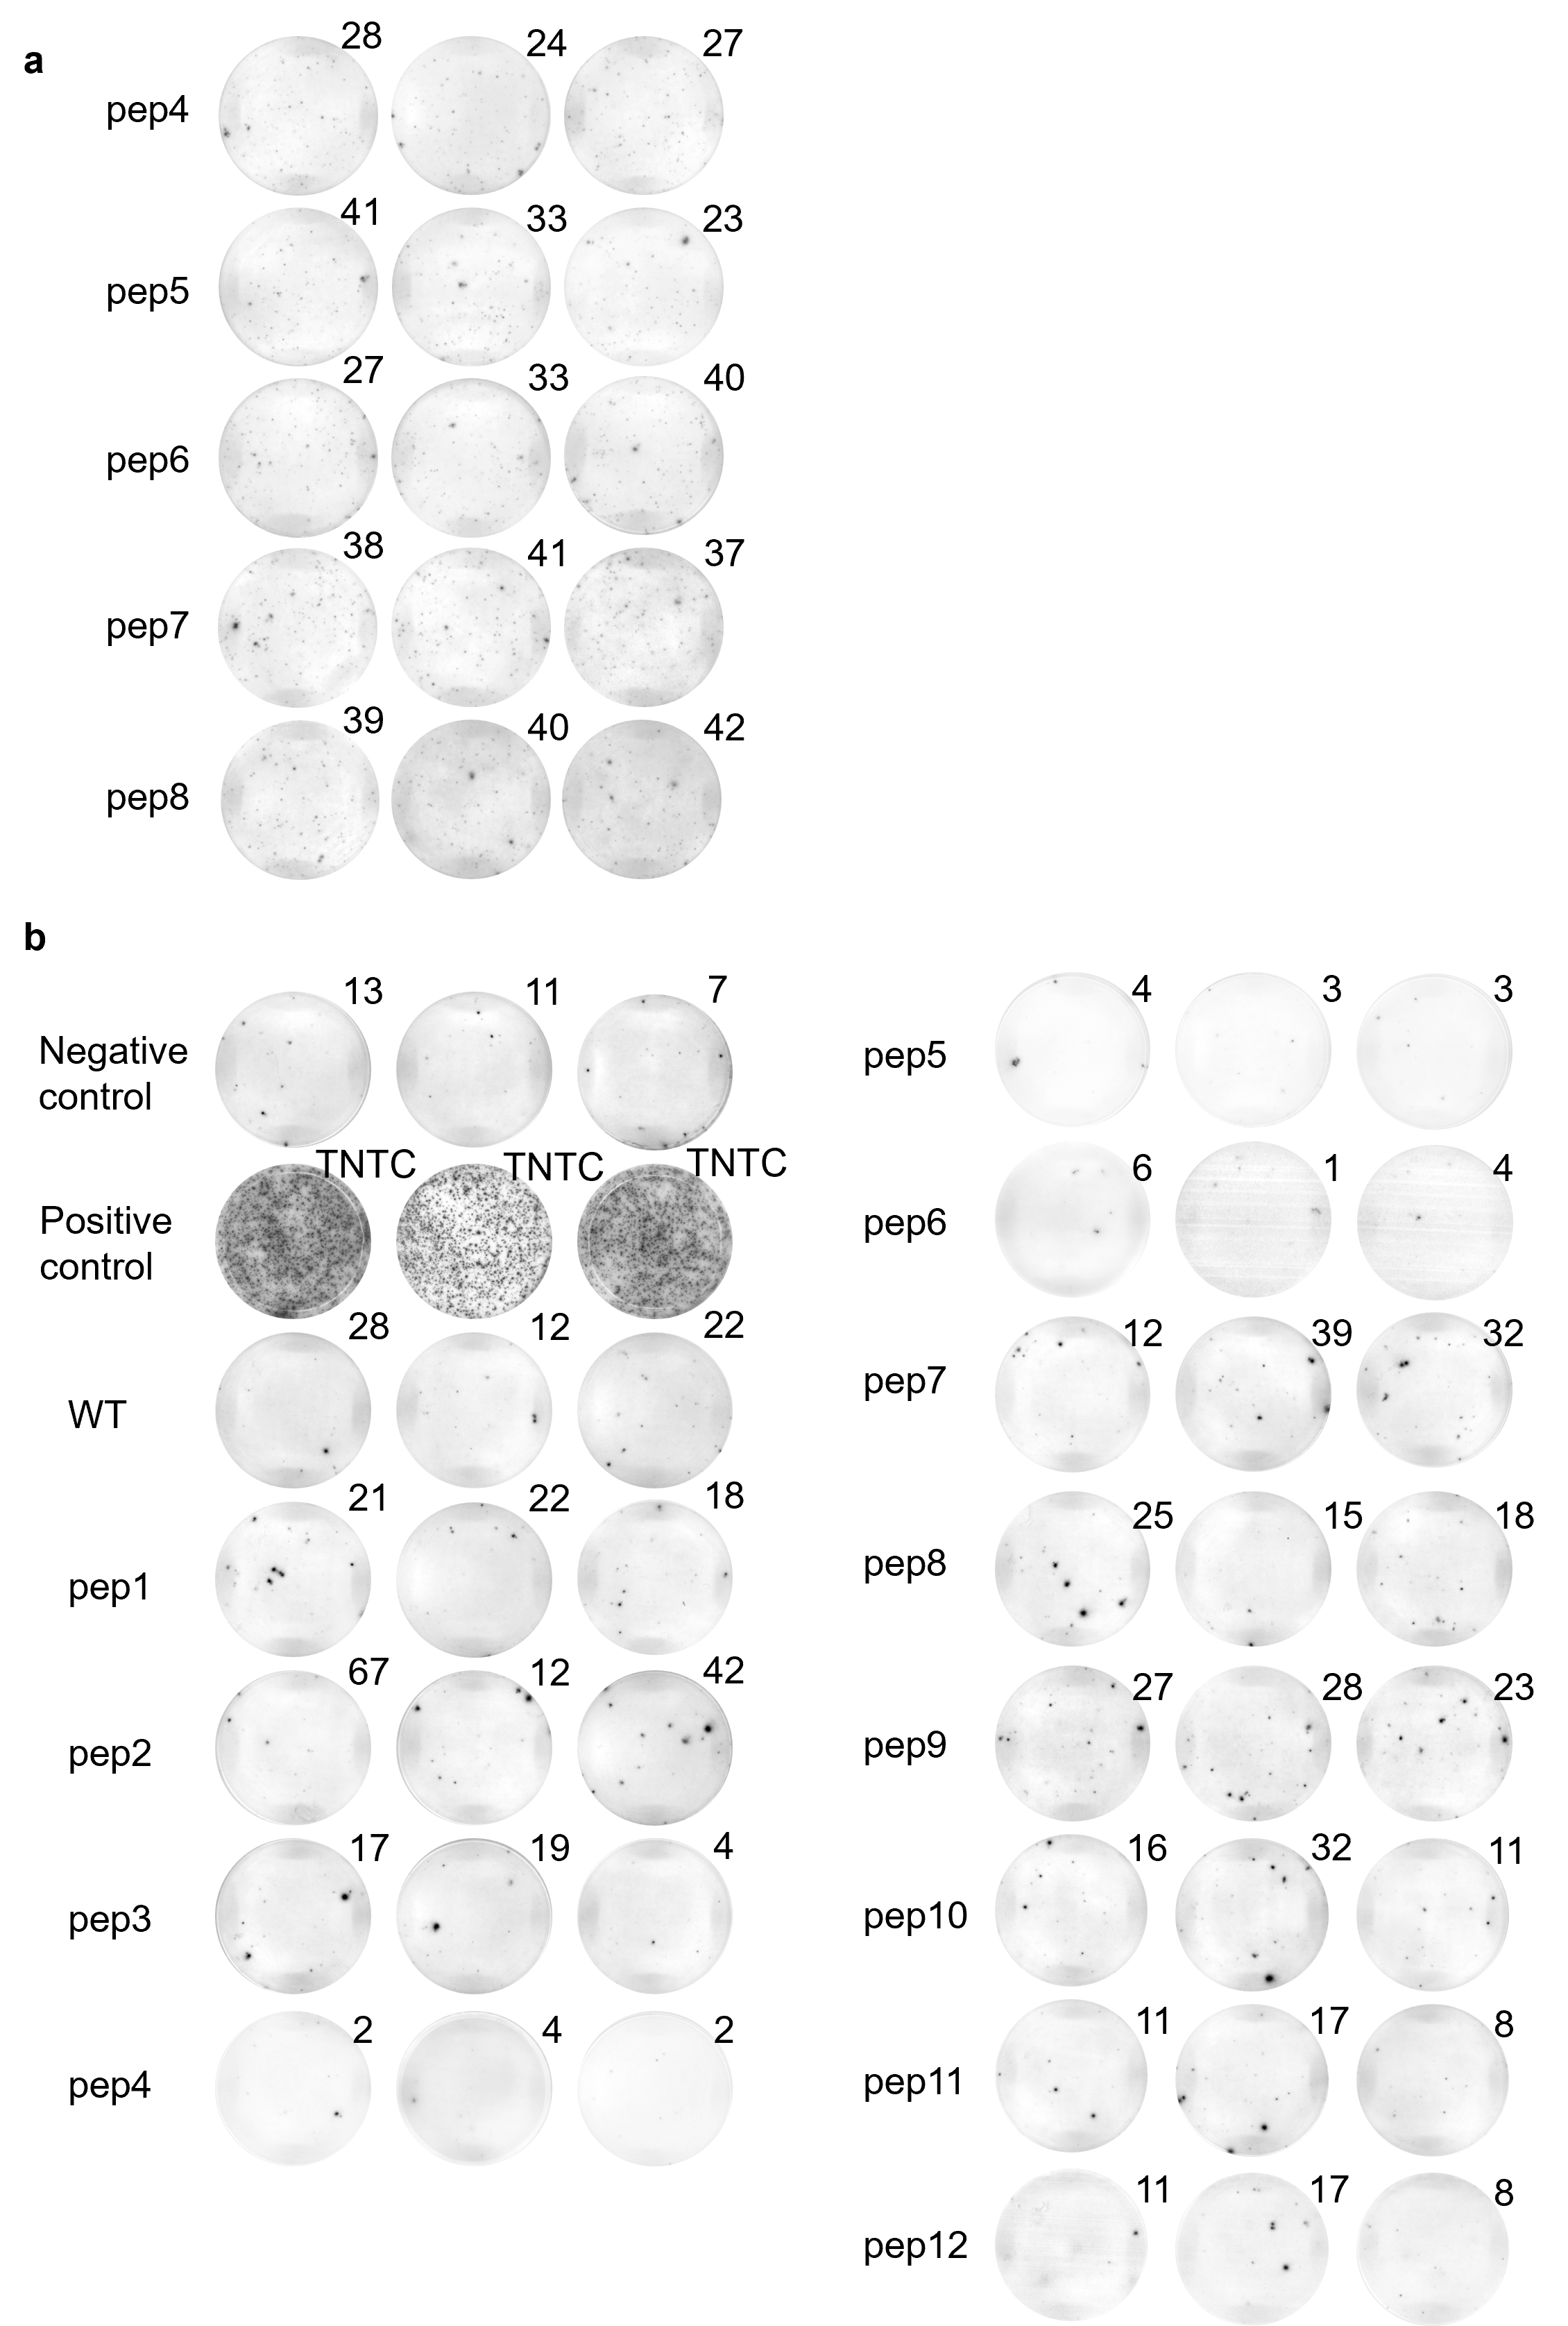
**

**Supplementary Fig. 6 ELISpot images. (a)** ELISpot images from donor 1 with no obvious activation. **(b)** ELISpot images from donor 2 show the same activation trend as donor 1.

**Supplementary Table 1 Biologically-derived peptides.**

| **Sequence** | **Resource** | **Abbreviation** | **Reference** |
| --- | --- | --- | --- |
| CQWGRLWQL | BING-4 peptide | CQW | Rosenberg et al., 20021 |
| GILGFVFTL | influenza virus peptide MP58–66 | GIL | Stewart-Jones et al., 20032 |
| ILAKFLHWL | Human telomerase reverse transcriptase (residues 540-548) | ILA | Cole et al., 20173 |
| ILCETCLIV | PH domain and leucine-rich repeat protein phosphatase 1 (residues 563-571) | ILC | Sachs et al., 20204 |
| RMFPNAPYL | Wilms tumor antigen WT126–134 | RMF | Holland et al., 20205 |
| SLLMWITQC | pMHC tumor epitope NY-ESO157–165 | SLL | Sami et al., 20076 |
| VMNILLQYV | Glutamic acid decarboxylase GAD65114-122 | VMN | Knight et al., 20147 |
| YLQPRTFLL | SARS-CoV-2 spike protein epitopes (residues 269-277) | YLQ | Wu et al., 20228 |
| AATPVGSLY | AT-rich interactive domain-containing protein 5B peptide | AAT | Oliveira et al., 20219 |
| GERQNATEI | Influenza A virus nucleoprotein (NP.17) | GER | Alexander et al., 201010 |
| LEDRDRSEL | Hepatitis C virus NS5A (2152–2160) | LED | Lauer et al., 200211 |
| QDIEITCVY | HPV18 E6 (26–34) | QDI | Alexander et al., 201010 |
| REVLLLKSL | E3 ubiquitin-protein ligase DTX3L (450-458) | REV | Oliveira et al., 20219 |
| RQWAQDLTL | Yellow fever virus EnvE (207–215) | RQW | Lund et al., 201112 |
| SENDRLRLL | Epstein–Barr virus BZLF1 (209–217) | SEN | Rist et al., 201413 |
| YEKKLALYL | Yellow fever virus NS4B (167–175) | YEK | Lund et al., 201112 |

**Supplementary Table 2 Benchmark for biologically-derived peptide optimization task.**

| **Biologically-derived peptide optimization task for HLA-A*02:01** | | | | | |
| --- | --- | --- | --- | --- | --- |
| **Model** | **ScoreConsensus** | **ScoreSMMPMBEC** | **ScoreMHCflurry 2.0** | **ScoreNetMHC 4.0** | **Richness** |
| Random | 0.009 ± 0.009 | 0.009 ± 0.010 | 0.010 ± 0.013 | 0.011 ± 0.012 | 0.999 ± 0.000 |
| IEDB+BLOSUM62 | 0.019 ± 0.020 | 0.019 ± 0.020 | 0.025 ± 0.031 | 0.025 ± 0.026 | 0.999 ± 0.000 |
| TransPHLA-AOMP | 0.343 ± 0.175 | 0.391 ± 0.196 | 0.390 ± 0.212 | 0.402 ± 0.160 | N.A. |
| pepPPO | 0.603 ± 0.160 | 0.629 ± 0.136 | 0.605 ± 0.206 | 0.645 ± 0.136 | 0.711 ± 0.034 |
| **AlphaVacc** | **0.988 ± 0.005** | **0.989 ± 0.004** | **0.895 ± 0.110** | **0.984 ± 0.011** | 0.765 ± 0.004 |

| **Biologically-derived peptide optimization task for HLA-B*40:02** | | | | | |
| --- | --- | --- | --- | --- | --- |
| **Model** | **ScoreConsensus** | **ScoreSMMPMBEC** | **ScoreMHCflurry 2.0** | **ScoreNetMHC 4.0** | **Richness** |
| Random | 0.124 ± 0.261 | 0.119 ± 0.235 | 0.059 ± 0.117 | 0.134 ± 0.311 | 0.999 ± 0.000 |
| IEDB+BLOSUM62 | 0.310 ± 0.319 | 0.326 ± 0.298 | 0.310 ± 0.260 | 0.300 ± 0.322 | 0.999 ± 0.000 |
| TransPHLA-AOMP | 0.271 ± 0.316 | 0.278 ± 0.297 | 0.300 ± 0.303 | 0.269 ± 0.335 | N.A. |
| pepPPO | 0.626 ± 0.341 | 0.691 ± 0.265 | 0.864 ± 0.135 | 0.691 ± 0.278 | 0.278 ± 0.029 |
| **AlphaVacc** | **0.781 ± 0.342** | **0.819 ± 0.276** | **0.826 ± 0.242** | **0.805 ± 0.298** | 0.824 ± 0.014 |

**Supplementary Table 3 Single AlphaVacc-generated mutation dataset size.**

| **Name** | **Size (Mutation pair number)** |
| --- | --- |
| Poor binder → Strong binder | 4211 |
| Poor binder → Normal binder | 12407 |
| Normal binder → Strong binder | 10111 |
| Normal binder → Normal binder | 25094 |
| Strong binder → Strong binder | 162106 |
| Total | 213929 |

**Supplementary Table 4 Poor binder sequences and their corresponding strong binder sequences.**

| **Poor Binder**  **Sequence** |  | **Strong Binder**  **Sequence** |  |
| --- | --- | --- | --- |
| YMPKYVISE | Z1 | YMPKYVISV | Z2 |
| YVMPWIVLD | Z3 | YVMPWIVLV | Z4 |
| FLIYPVPTN | Z5 | FLIYPVPTV | Z6 |
| ALVEYVPTH | Z7 | ALVEYVPTV | Z8 |
| THMDLIILV | Z9 | TLMDLIILV | Z10 |
| YKIPALIAV | Z11 | YMIPALIAV | Z12 |
| FDMDHPTYL | Z13 | FLMDHPTYL | Z14 |
| FIMGHVLEW | Z15 | FIMGHVLEV | Z16 |

**Supplementary Table 5 Normal binder sequences and their corresponding strong binder sequences.**

| **Normal Binder**  **Sequence** |  | **Strong Binder**  **Sequence** |  |
| --- | --- | --- | --- |
| ALRDILPHL | Z17 | ALMDILPHL | Z18 |
| KADDIRIFV | Z19 | KAMDIRIFV | Z20 |
| YIHDPVQHV | Z21 | YIMDPVQHV | Z22 |
| NLIGIRVQV | Z23 | NLIGIRVYV | Z24 |
| YLMGILIPE | Z25 | YLMDILIPE | Z26 |
| NLANPIVHV | Z27 | NLANPIFHV | Z28 |
| FAIDPVVHL | Z29 | FAIDLVVHL | Z30 |
| NLIFHQIIV | Z31 | NLIEHQIIV | Z32 |

**Supplementary Table 6 Peptide exchange efficiency of all peptides.**

| **Analyzed sample** | **MFIFITC** |
| --- | --- |
| Control #2: 0% Exiting peptide or 100% peptide exchange | 395 |
| Control #3: 100% Exiting peptide or 0% peptide exchange | 22208 |

| **Analyzed sample** | **MFIFITC** | **%Peptide exchange efficiency** |
| --- | --- | --- |
| Standard peptide | 3535 | 85.60 |
| Z1 | 18886 | 15.23 |
| Z2 | 3727 | 84.72 |
| Z3 | 10371 | 54.27 |
| Z4 | 4269 | 82.24 |
| Z5 | 8357 | 63.5 |
| Z6 | 3630 | 85.17 |
| Z7 | 15329 | 31.54 |
| Z8 | 3594 | 85.33 |
| Z9 | 6360 | 72.65 |
| Z10 | 3335 | 86.52 |
| Z11 | 12649 | 43.82 |
| Z12 | 3260 | 86.87 |
| Z13 | 11739 | 47.99 |
| Z14 | 4521 | 81.08 |
| Z15 | 13392 | 40.42 |
| Z16 | 3630 | 85.17 |
| Z17 | 8028 | 65.01 |
| Z18 | 3096 | 87.62 |
| Z19 | 3465 | 85.93 |
| Z20 | 3228 | 87.01 |
| Z21 | 3890 | 83.98 |
| Z22 | 3399 | 86.23 |
| Z23 | 3741 | 84.66 |
| Z24 | 3917 | 83.85 |
| Z25 | 5188 | 78.03 |
| Z26 | 3385 | 86.29 |
| Z27 | 4685 | 80.33 |
| Z28 | 3870 | 84.07 |
| Z29 | 8056 | 64.88 |
| Z30 | 3708 | 84.81 |
| Z31 | 9461 | 58.44 |
| Z32 | 3630 | 85.17 |

**Supplementary Table 7 Ablation analysis for the contribution of the peptide hallucination process.**

| **Biologically-derived peptide optimization task** | | | | | |
| --- | --- | --- | --- | --- | --- |
| **Model** | **ScoreConsensus** | **ScoreSMMPMBEC** | **ScoreMHCflurry 2.0** | **ScoreNetMHC 4.0** | **Richness** |
| AlphaVacc | 0.988 ± 0.005 | 0.989 ± 0.004 | 0.895 ± 0.110 | 0.984 ± 0.011 | 0.765 ± 0.004 |
| SFT(AlphaVacc) | 0.539 ± 0.109 | 0.544 ± 0.119 | 0.419 ± 0.167 | 0.517 ± 0.117 | 0.991 ± 0.003 |

**Supplementary Table 8 Amino acid sequences and abbreviations of candidate peptides from CQW.**

| **Abbreviation** | **Sequence** |
| --- | --- |
| WT/CQW | CQWGRLWQL |
| pep1 | YQWGRLWQL |
| pep2 | CQWGWLWQL |
| pep3 | YQWGWLWQL |
| pep4 | YQMGRLWQL |
| pep5 | YLMGRLWQL |
| pep6 | YQWGRFWHL |
| pep7 | YQWGRPYQL |
| pep8 | YQWWRFWHL |
| pep9 | SQWGFPYQL |
| pep10 | YQWGFPYQL |
| pep11 | YLWAQLWQV |
| pep12 | YLWAIIWQL |

**Supplementary Table 9 Peptide exchange efficiency of CQW and candidates.**

| **Analyzed sample** | **MFIFITC** |
| --- | --- |
| Control #2: 0% Exiting peptide or 100% peptide exchange | 449 |
| Control #3: 100% Exiting peptide or 0% peptide exchange | 35445 |

| **Analyzed sample** | **MFIFITC** | **%Peptide exchange efficiency** |
| --- | --- | --- |
| Standard peptide | 2903 | 92.99 |
| WT/CQW | 4618 | 85.89 |
| 4381 | 86.69 |
| 4381 | 86.69 |
| pep1 | 2779 | 92.13 |
| 3318 | 90.30 |
| 3355 | 90.18 |
| pep2 | 3950 | 88.15 |
| 4236 | 87.18 |
| 3915 | 88.27 |
| pep3 | 3136 | 90.92 |
| 3065 | 91.16 |
| 2983 | 91.44 |
| pep4 | 3179 | 90.77 |
| 3399 | 90.03 |
| 3503 | 89.67 |
| pep5 | 3526 | 89.59 |
| 3352 | 90.19 |
| 3207 | 90.68 |
| pep6 | 3459 | 89.82 |
| 3204 | 90.69 |
| 3580 | 89.41 |
| pep7 | 3713 | 88.96 |
| 3637 | 89.22 |
| 3783 | 88.72 |
| pep8 | 4475 | 90.36 |
| 5161 | 91.51 |
| 4832 | 90.90 |
| pep9 | 3229 | 86.37 |
| 3596 | 84.04 |
| 3848 | 85.16 |
| pep10 | 3300 | 90.60 |
| 2963 | 89.36 |
| 3142 | 88.50 |
| pep11 | 3088 | 91.08 |
| 2542 | 92.94 |
| 2930 | 91.62 |
| pep12 | 3470 | 89.79 |
| 3488 | 89.72 |
| 3650 | 89.17 |

**Supplementary Table 10 MFIFITC of all peptides in the T2 binding assay.**

| **Analyzed sample** | **MFIFITC** | | |
| --- | --- | --- | --- |
| Only APC | 4651 | 5592 | 5318 |
| WT/CQW | 5589 | 6211 | 5930 |
| pep1 | 6402 | 6932 | 7653 |
| pep2 | 7751 | 6919 | 7404 |
| pep3 | 6669 | 7054 | 6367 |
| pep4 | 7103 | 7117 | 7514 |
| pep5 | 7691 | 7353 | 8555 |
| pep6 | 7520 | 7969 | 8344 |
| pep7 | 7422 | 7880 | 8385 |
| pep8 | 6313 | 6653 | 8176 |
| pep9 | 7885 | 7397 | 7052 |
| pep10 | 6103 | 6399 | 8035 |
| pep11 | 6254 | 6419 | 8608 |
| pep12 | 8441 | 7943 | 8326 |
